CORRECTION

# Correction: Analysis of Response Elements Involved in the Regulation of the Human Neonatal Fc Receptor Gene (*FCGRT*)

Joanna E. Mikulska

## Notice of Republication

This article was republished on September 17, 2015, to correct formatting errors to Tables 1–3 and symbol errors in figure legends. Please download this article again to view the correct version. The originally published, uncorrected article and the republished, corrected article are provided here for reference.

## Supporting Information

**S1 File. Originally published, uncorrected article.**  
(PDF)

**S2 File. Republished, corrected article.**  
(PDF)

## Reference

1. Mikulska JE (2015) Analysis of Response Elements Involved in the Regulation of the Human Neonatal Fc Receptor Gene (*FCGRT*). PLoS ONE 10(8): e0135141. doi:[10.1371/journal.pone.0135141](https://doi.org/10.1371/journal.pone.0135141) PMID: [26252948](https://pubmed.ncbi.nlm.nih.gov/26252948/)

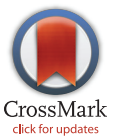

## OPEN ACCESS

**Citation:** Mikulska JE (2015) Correction: Analysis of Response Elements Involved in the Regulation of the Human Neonatal Fc Receptor Gene (*FCGRT*). PLoS ONE 10(9): e0139744. doi:[10.1371/journal.pone.0139744](https://doi.org/10.1371/journal.pone.0139744)

**Published:** September 29, 2015

**Copyright:** © 2015 Joanna E. Mikulska. This is an open access article distributed under the terms of the [Creative Commons Attribution License](https://creativecommons.org/licenses/by/4.0/), which permits unrestricted use, distribution, and reproduction in any medium, provided the original author and source are credited.
